# Supplementary material
Source: PubMed Central journal article supplement (PMC7065507)

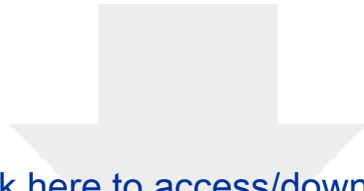

Click here to access/download  
**Supplementary Material**  
Mchat acknowledgement.docx

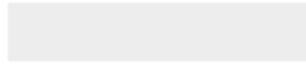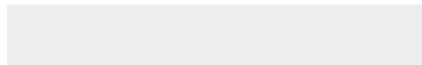

Supplement: NIHMS1537473-supplement-1.pdf [file NIHMS1537473-supplement-1.pdf]
